# Supplementary material for: Hotspot Regions of Quantitative Trait Loci and Candidate Genes for Ear-Related Traits in Maize: A Literature Review
Source: MDPI journal article supplement (doi:10.3390/genes15010015), 2023-12-21
Supplement: s1 [file s1]

**Supplementary Table S1.** Summary information table of QTLs for ear-related traits.

| Combination        | Population type                | Method   | arker type | Trait | Chromosome       | Number of QTL | Genetic effect | Gene action | phenotypic variation explained | Reference |
|--------------------|--------------------------------|----------|------------|-------|------------------|---------------|----------------|-------------|--------------------------------|-----------|
| Mo17 x H99         | F <sub>6:7</sub>               | IM       | RFLP       | EL    | 1,2,4,6,8        | 6             | A              | -           | 2.10%-5.60%                    | [29]      |
| 48-2 x 5003        | F <sub>2:3</sub>               | IM       | RFLP、SSR   | EL    | 1,2,4,10         | 4             | A、D            | A、OD、PD     | 11.00%-31.50%                  | [30]      |
| Mo17 x Huangzaosi  | F <sub>2:3</sub>               | CIM      | RFLP、SSR   | EL    | 1,3,4,5,7,9      | 8             | A、D            | A、D、OD、PD   | 2.61%-16.18%                   | [64]      |
| 178 x 9782         | RIL                            | CIM      | SSR        | EL    | 4,6,8            | 4             | A              | -           | 5.44%-8.76%                    | [31]      |
| 08-641 x Ye478     | RIL                            | ICIM     | SNP        | EL    | 1,3,5,7,8,10     | 15            | A、D            | -           | 3.19%-11.29%                   | [32]      |
|                    | IF <sub>2</sub>                |          |            |       | 1,3,5,6,7,8,10   | 21            |                |             | 2.67%-13.64%                   |           |
| Yi16 x B73         | F <sub>2</sub>                 | ICIM     | SSR        | EL    | 4,9              | 2             | A、D            | A、PD        | 6.70%-8.90%                    | [33]      |
|                    | F <sub>2:3</sub>               |          |            |       | 7                | 1             |                |             | 9.70%                          |           |
| Mo17 x KW7         | RIL                            | ICIM     | SNP        | EL    | 6                | 1             | A              | -           | 18.87%                         | [34]      |
| Mo17 x H99         | F <sub>2:3</sub>               | IM       | RFLP       | ED    | 1,2,3,6,7,8      | 6             | A、D            | D、OD、PD     | 10.00%-24.00%                  | [35]      |
| Mo17 x Huangzaosi  | F <sub>9</sub>                 | CIM      | SSR        | ED    | 4,9              | 4             | A              | -           | 5.68%-8.70%                    | [37]      |
| PB260 x PB266      | F <sub>2:3</sub>               | IM       | RFLP、SSR   | ED    | 1,3,7            | 4             | A              | D、OD、PD     | 8.70%-19.10%                   | [38]      |
| Dan32 x N04        | BC <sub>2</sub> F <sub>2</sub> | CIM      | SSR        | ED    | 2,4,8,10         | 6             | A              | -           | 4.40%-16.00%                   | [36]      |
|                    | F <sub>2</sub>                 |          |            |       | 4,5,8,10         | 3             |                |             | 7.10%-14.80%                   |           |
| SG-5 x SG-7        | F <sub>2</sub>                 | CIM      | SNP        | ED    | 1,4,9            | 5             | A、D            | -           | 6.40%-11.60%                   | [39]      |
| X178 x 9782        | F <sub>2:3</sub>               | ICIM-ADD | SSR        | ED    | 1,2,3,5,8,10     | 12            | A              | -           | 4.16%-20.44%                   | [20]      |
| Y32 x Y107         | F <sub>7</sub>                 | CIM      | SSR        | ED    | 1,9              | 3             | A、D            | -           | 7.10%-10.2%                    | [41]      |
| SG-5 x SG-7        | F <sub>2:3</sub>               | CIM      | SNP        | ED    | 1,4,10           | 4             | A、D            | -           | 8.50%-12.00%                   | [40]      |
| []B73 x Mo17       | F <sub>2:3</sub>               | IM       | RFLP       | KRN   | 4,5,7,9          | 4             | A,D            | -           | 8.00%-10.00%                   | [42]      |
| Zong3 x 87-1       | F <sub>2:3</sub>               | MIM      | RFL、SSR    | KRN   | 1,2,4,5,6,8,9,10 | 8             | A、D            | -           | 5.80%-13.20%                   | [43]      |
| L-08-05F x L-14-4B | F <sub>2:3</sub>               | CIM      | SSR        | KRN   | 1,2,3,7,8,9,10   | 10            | A、D            | -           | 2.40%-16.90%                   | [44]      |

|                           |                  |          |     |      |                    |    |     |           |               |      |
|---------------------------|------------------|----------|-----|------|--------------------|----|-----|-----------|---------------|------|
| B73 x SICAU1212           | F <sub>2</sub>   | CIM      | SSR | KRN  | 2,4,8              | 7  | A、D | A、D、OD、PD | 6.78%-36.76%  | [45] |
| Ye478 x Qi319             | RIL              | CIM      | SNP | KRN  | 2,3,4,5,6,8,9,10   | 10 | A   | A         | 5.39%-7.79%   | [47] |
| V54 x Lian87              | F <sub>2:3</sub> | CIM      | SSR | KRN  | 1,2,3,4,5,7,8,9,10 | 12 | A、D | A、D、OD、PD | 1.40%-14.95%  | [49] |
| T32 x 319                 | F <sub>2:3</sub> | ICIM-ADD | SNP | KRN  | 1,5,8              | 4  | A、D | OD        | 4.13%-8.33%   | [50] |
| NIL-1133B x B73           | F <sub>2</sub>   | ICIM-ADD | SNP | KRN  | 4                  | 1  | A、D | -         | 32.6%         | [48] |
|                           | F <sub>2:3</sub> |          |     |      | 4                  | 1  |     |           | 14.61%        |      |
| D276 x D72//A188 x Jiao51 | Four-way cross   | ICIM     | SSR | KRN  | 1,4,6,7,9,10       | 7  | A、D | -         | 4.74%-11.24%  | [46] |
| Zong3 x 87-1              | F <sub>2:3</sub> | CIM      | SSR | KNPR | 1,2,6,8,9          | 6  | A、D | A、D、OD    | 5.40%-11.80%  | [51] |
| L26 x 095                 | F <sub>2</sub>   | CIM      | SSR | KNPR | 1,9,10             | 3  | A、D | A、D       | 17.01%-29.65% | [52] |
| TY6 x Mo17                | F <sub>2:3</sub> | CIM      | SSR | KNPR | 1,3                | 3  | A、D | A、OD、PD   | 3.40%-17.60%  | [53] |
| TY6 x W138"               |                  |          |     |      | 1,3,5,7            | 7  |     |           | 0.40%-17.70%  |      |
| Baicibaogu x Qiranhuang   | F <sub>2:3</sub> | IM       | SSR | KNPR | 1,4,5,7,           | 5  | A   | -         | 5.40%-11.80%  | [54] |
| TML418 x Ye107            | F <sub>7</sub>   | CIM      | SNP | KNPR | 7,8,10             | 4  | A   | -         | 5.00%-14.10%  | [56] |
| CML312 x Ye107            |                  |          |     | KNPR | 1                  | 3  |     |           | 6.60%-9.80%   |      |
| B73 x K67-1               | IL               | ICIM     | SNP | KNPR | 1,4,6,7,8,10       | 10 | A   | -         | 2.23%-10.60%  | [55] |
| Mo17x TY16                | F <sub>2:3</sub> | ICIM     | SSR | KNPR | 1,3,10             | 3  | A、D | OD、PD     | 3.40%-17.160% | [3]  |
| W138 x TY16               |                  |          |     |      | 1,2,3,5,7          | 6  |     |           | 0.40%-17.80%  |      |
| Mc x V671                 | F <sub>2:3</sub> | CIM      | SSR | KL   | 2,9                | 6  | A、D | A、D、OD、PD | 1.18%-12.92%  | [57] |
|                           |                  |          |     | KW   | 1,2,3,4,5,6,9      | 16 |     |           | 1.70%-20.51%  |      |
|                           |                  |          |     | KT   | 1,2,4,5,8,9,10     | 18 |     |           | 0.84%-17.98%  |      |
|                           |                  |          |     | HKW  | 1,2,4,5,7          | 15 |     |           | 0.46%-12.8%   |      |
| Zheng58 x SK              | F <sub>6</sub>   | CIM      | SSR | KL   | 1,2,3,4,5,6,7,8,9  | 18 | A、D | A         | 4.0%-12.54%   | [58] |
|                           |                  |          |     | KT   | 1,3,4,5,6,7,8,9,10 | 26 |     |           | 3.15%-23.69%  |      |
|                           |                  |          |     |      | 1,2,3,4,5,7,8,9,10 | 23 |     |           | 4.08%-17.93%  |      |

|                |                  |          |     |     |                      |    |     |           |               |      |
|----------------|------------------|----------|-----|-----|----------------------|----|-----|-----------|---------------|------|
| 178 x K12      | F <sub>7</sub>   | ICIM     | SSR | HKW | 1,2,3,5,6,7,8,9      | 19 | A   | -         | 3.66%-17.89%  | [59] |
|                |                  |          |     | KL  | 1,2,3,4,8,9          | 9  |     |           | 7.57%-21.67%  |      |
|                |                  |          |     | KW  | 1,3,4,5,7            | 12 |     |           | 6.58%-23.49   |      |
|                |                  |          |     | KT  | 1,2,3,4,5,7,8,9      | 15 |     |           | 6.30%-22.92%  |      |
| Mo17 x B73     | DH               | CIM      | SNP | HKW | 1,2,3,4,7,8,10       | 14 | A   |           | 5.80%-21.54%  | [60] |
|                |                  |          |     | KL  | 1,2,3,5,6,7,9        | 15 |     |           | 3.48%-10.11%  |      |
|                |                  |          |     | KW  | 1,2,3,4,7,8,9,10     | 21 |     |           | 3.80%-8.43%   |      |
|                |                  |          |     | KT  | 1,3,4,6,7,8,10       | 9  |     |           | 3.38%-15.04%  |      |
| 082 x Ye107    | F <sub>2,3</sub> | CIM      | SSR | KL  | 1,3,7,10             | 5  | A、D | A、D、OD、PD | 8.30%-11.56%  | [64] |
|                |                  |          |     | KW  | 5,6                  | 2  |     | PD        | 10.20%-18.02% |      |
|                |                  |          |     | KT  | 1,3,7                | 4  |     |           | 8.90%-13.19%  |      |
|                |                  |          |     | HKW | 6,7,9,10             | 5  |     | D、OD、PD   | 8.11%-13.56%  |      |
| Ye478 x 08-641 | IF <sub>2</sub>  |          |     | KL  | 1,2,3,5,7,9,10       | 14 | A、D |           | 0.46%-16.33%  | [62] |
|                |                  |          |     | KW  | 1,2,3,4,5,6,7,8,9,10 | 19 |     |           | 3.45%-8.08%   |      |
|                |                  |          |     | KT  | 1,2,3,5,7,8,9        | 12 |     |           | 3.71%-9.79%   |      |
|                |                  |          |     | HKW | 1,3,4,5,7,9,10       | 16 |     |           | 2.76%-10.32%  |      |
|                | RIL              | ICIM-ADD | SNP | KL  | 1,2,6,9              | 8  |     |           | 1.08%-12.35%  |      |
|                |                  |          |     | KW  | 1,2,3,4,9            | 7  |     |           | 0.81%-7.88%   |      |
|                |                  |          |     | KT  | 3,7                  | 2  |     |           | 3.30%-5.72%   |      |
|                |                  |          |     | HKW | 3,5,6,7,9            | 8  |     |           | 4.70%-8.07%   |      |
| L220 x PH4CV   | F <sub>2</sub>   | ICIM     | SNP | KL  | 2,8,9                | 3  | A、D | -         | 5.05%-7.44%   | [61] |
|                |                  |          |     | KW  | 3,4,8                | 3  |     |           | 6.35%-13.77%  |      |
|                |                  |          |     | KT  | 1,2,6                | 4  |     |           | 4.47%-7.99%   |      |
|                |                  |          |     | HKW | 4,9                  | 2  |     |           | 9.47%-10.86%  |      |
| SG-5 x SG-7    | F <sub>2</sub>   | CIM      | SNP | KL  | 2,3,9,10             | 5  | A、D | -         | 4.20%-14.80%  | [63] |
|                |                  |          |     | KW  | 1,2,3,8,10           | 7  |     |           | 4.50%-23.00%  |      |

|                  |    |               |    |              |  |
|------------------|----|---------------|----|--------------|--|
| F <sub>2:3</sub> | KL | 2,3,5,6,7,8,9 | 15 | 4.40%-15.30% |  |
|                  | KW | 1,2,3,8       | 10 | 5.00%-14.50% |  |

**Supplementary Table S2.** Distribution of stable QTLs for ear-related traits on chromosomes.

|       | Chr 1 | Chr 2 | Chr 3 | Chr 4 | Chr 5 | Chr 6 | Chr 7 | Chr 8 | Chr 9 | Chr 10 | Total |
|-------|-------|-------|-------|-------|-------|-------|-------|-------|-------|--------|-------|
| EL    | 3     | 3     | 0     | 0     | 2     | 0     | 0     | 1     | 0     | 0      | 9     |
| ED    | 0     | 0     | 1     | 1     | 1     | 0     | 0     | 0     | 0     | 0      | 3     |
| KRN   | 2     | 1     | 0     | 5     | 2     | 1     | 1     | 0     | 0     | 0      | 12    |
| KNPR  | 3     | 0     | 1     | 0     | 0     | 1     | 0     | 0     | 0     | 1      | 6     |
| KL    | 2     | 1     | 5     | 1     | 0     | 1     | 3     | 0     | 5     | 1      | 19    |
| KW    | 2     | 4     | 4     | 3     | 2     | 1     | 0     | 3     | 0     | 3      | 22    |
| KT    | 4     | 1     | 2     | 2     | 0     | 1     | 0     | 0     | 2     | 4      | 16    |
| HKW   | 4     | 4     | 1     | 1     | 0     | 0     | 2     | 0     | 2     | 1      | 15    |
| Total | 20    | 14    | 14    | 13    | 7     | 5     | 6     | 4     | 9     | 10     | 102   |

**Supplementary Table S3.** Summary information table for stable QTLs for ear related traits.

| Chromosome | Bin region  | Traits involved      | Reference |
|------------|-------------|----------------------|-----------|
| Chr 4      | 4.09        | KRN(2 environments)  | [33]      |
| Chr 7      | 7.00        | HKW(2 environments)  |           |
| Chr 1      | 1.05-1.06   | EL(2 environments)   | [92]      |
| Chr 2      | 2.06        | EL(2 environments)   |           |
| Chr 5      | 5.06-5.08   | EL(2 environments)   |           |
| Chr 3      | 3.05        | ED(2 environments)   |           |
| Chr 2      | 2.03        | EL(3 environments)   | [20]      |
| Chr 8      | 8.08        | EL(2 environments)   |           |
| Chr 5      | 5.01        | EL(2 environments)   |           |
| Chr 1      | 1.05        | HKW(2 environments)  |           |
| Chr 4      | 4.09        | KRN(2 environments)  |           |
| Chr 9      | 9.03-9.04   | KL(2 environments)   |           |
| Chr 8      | 8.06-8.08   | KW(3 environments)   | [54]      |
| Chr 10     | 10.03-10.04 | KT(2 environments)   |           |
| Chr 9      | 9.03-9.04   | HKW(2 environments)  |           |
| Chr 5      | 5.04        | KRN(2 environments)  |           |
| Chr 10     | 10.03-10.04 | KNPR(2 environments) | [72]      |
| Chr 7      | 7.02        | KRN(2 environments)  |           |
| Chr 2      | 2.08-2.09   | KRN(4 environments)  | [49]      |
| Chr 4      | 4.02-4.05   | KRN(2 environments)  |           |
| Chr 4      | 4.06-4.11   | KRN(4 environments)  |           |
| Chr 1      | 1.11        | KRN(2 environments)  |           |
| Chr 1      | 1.12        | KRN(2 environments)  | [80]      |
| Chr 1      | 1.08        | KNPR(2 environments) |           |
| Chr 6      | 6.05        | KNPR(2 environments) |           |
| Chr 1      | 1.09        | EL(2 environments)   |           |
| Chr 1      | 1.10        | EL(2 environments)   |           |
| Chr 2      | 2.04        | EL(2 environments)   |           |
| Chr 1      | 1.04        | KNPR(2 environments) |           |
| Chr 1      | 1.09        | KNPR(2 environments) |           |
| Chr 3      | 3.04        | KNPR(2 environments) | [53]      |
| Chr 4      | 4.07-4.08   | KRN(2 environments)  |           |
| Chr 5      | 5.03        | KRN(2 environments)  |           |
| Chr 6      | 6.01        | KRN(2 environments)  |           |
| Chr 4      | 4.08        | ED(2 environments)   |           |
| Chr 5      | 5.03        | ED(2 environments)   |           |
| Chr 3      | 3.01        | HKW(2 environments)  |           |
| Chr 7      | 7.02        | HKW(2 environments)  |           |
| Chr 2      | 2.00-2.02   | KT(2 environments)   | [70]      |

|        |           |                     |      |
|--------|-----------|---------------------|------|
| Chr 7  | 4.09      | KL(2 environments)  |      |
| Chr 2  | 2.06      | HKW(2 environments) |      |
| Chr 4  | 4.05-4.06 | HKW(2 environments) |      |
| Chr 10 | 10.07     | HKW(3 environments) |      |
| Chr 1  | 1.09-1.10 | KL(2 environments)  |      |
| Chr 4  | 4.03-4.05 | KL(2 environments)  | [99] |
| Chr 10 | 10.07     | KL(2 environments)  |      |
| Chr 3  | 3.09      | KW(3 environments)  |      |
| Chr 10 | 10.07     | KW(6 environments)  |      |
| Chr 3  | 3.01-3.03 | KT(2 environments)  |      |
| Chr 10 | 10.04     | KT(3 environments)  |      |
| Chr 9  | 9.02-9.03 | KL(4 environments)  |      |
| Chr 9  | 9.04      | KL(4 environments)  |      |
| Chr 1  | 1.02-1.03 | KW(5 environments)  |      |
| Chr 2  | 2.05      | KW(2 environments)  |      |
| Chr 2  | 2.07      | KW(2 environments)  |      |
| Chr 2  | 2.07      | KW(3 environments)  |      |
| Chr 2  | 2.08      | KW(2 environments)  |      |
| Chr 3  | 3.08      | KW(2 environments)  |      |
| Chr 4  | 4.08      | KW(3 environments)  |      |
| Chr 4  | 4.08      | KW(3 environments)  |      |
| Chr 1  | 1.02      | KT(2 environments)  |      |
| Chr 1  | 1.03      | KT(2 environments)  |      |
| Chr 1  | 1.04      | KT(4 environments)  | [57] |
| Chr 1  | 1.04-1.05 | KT(5 environments)  |      |
| Chr 4  | 4.08      | KT(3 environments)  |      |
| Chr 9  | 9.03      | KT(3 environments)  |      |
| Chr 9  | 9.04-9.05 | KT(2 environments)  |      |
| Chr 10 | 10.02     | KT(2 environments)  |      |
| Chr 10 | 10.03     | KT(3 environments)  |      |
| Chr 1  | 1.01      | HKW(2 environments) |      |
| Chr 1  | 1.03      | HKW(2 environments) |      |
| Chr 1  | 1.04      | HKW(2 environments) |      |
| Chr 2  | 2.02      | HKW(2 environments) |      |
| Chr 2  | 2.07      | HKW(2 environments) |      |
| Chr 2  | 2.08      | HKW(2 environments) |      |
| Chr 1  | 1.08-1.09 | KL(2 environments)  |      |
| Chr 2  | 2.05      | KL(2 environments)  |      |
| Chr 3  | 3.05      | KL(3 environments)  | [60] |
| Chr 3  | 3.06      | KL(2 environments)  |      |
| Chr 6  | 6.06      | KL(2 environments)  |      |

|        |           |                     |      |
|--------|-----------|---------------------|------|
| Chr 1  | 1.08      | KW(3 environments)  |      |
| Chr 3  | 3.01      | KW(2 environments)  |      |
| Chr 4  | 4.04      | KW(2 environments)  |      |
| Chr 10 | 10.05     | KW(4 environments)  |      |
| Chr 10 | 10.06     | KW(2 environments)  |      |
| Chr 4  | 4.02      | KT(4 environments)  |      |
| Chr 6  | 6.06      | KT(2 environments)  |      |
| Chr 3  | 3.06-3.08 | KL(3 environments)  |      |
| Chr 3  | 3.02-3.03 | KL(2 environments)  |      |
| Chr 5  | 5.00      | KW(3 environments)  | [64] |
| Chr 6  | 6.00      | KW(3 environments)  |      |
| Chr 3  | 3.06      | KT(3 environments)  |      |
| Chr 9  | 9.03-9.04 | HKW(2 environments) |      |
| Chr 3  | 3.04      | KW(3 environments)  |      |
| Chr 8  | 8.06      | KW(2 environments)  |      |
| Chr 8  | 8.06      | KW(2 environments)  | [63] |
| Chr 7  | 7.03      | KL(2 environments)  |      |
| Chr 9  | 9.05      | KL(3 environments)  |      |
| Chr 9  | 9.04      | KL(2 environments)  |      |
| Chr 3  | 3.04/3.05 | KL(2 environments)  |      |
| Chr 5  | 5.03/5.04 | KW(2 environments)  | [46] |
| Chr 7  | 7.02/7.03 | KL(2 environments)  |      |



**Supplementary Table S4.** Distribution of major QTLs for ear-related traits on chromosomes.

|       | Chr 1 | Chr 2 | Chr 3 | Chr 4 | Chr 5 | Chr 6 | Chr 7 | Chr 8 | Chr 9 | Chr 10 | Total |
|-------|-------|-------|-------|-------|-------|-------|-------|-------|-------|--------|-------|
| EL    | 1     | 2     | 1     | 0     | 0     | 1     | 0     | 0     | 0     | 2      | 7     |
| ED    | 2     | 1     | 2     | 0     | 0     | 1     | 4     | 3     | 0     | 0      | 13    |
| KRN   | 0     | 4     | 0     | 1     | 0     | 0     | 1     | 2     | 1     | 1      | 10    |
| KNPR  | 5     | 0     | 0     | 0     | 0     | 0     | 1     | 1     | 0     | 1      | 8     |
| KL    | 1     | 0     | 1     | 1     | 0     | 0     | 0     | 1     | 0     | 0      | 4     |
| KW    | 4     | 2     | 2     | 0     | 1     | 1     | 0     | 0     | 0     | 0      | 10    |
| KT    | 2     | 1     | 4     | 2     | 1     | 0     | 2     | 0     | 0     | 0      | 12    |
| HKW   | 5     | 2     | 1     | 2     | 0     | 0     | 1     | 1     | 0     | 0      | 12    |
| Total | 20    | 12    | 11    | 6     | 2     | 3     | 9     | 8     | 1     | 4      | 76    |

**Supplementary Table S5.** Summary information table for major QTLs for ear related traits.

| Chromosome | Bin region | Physical interval/bp     | Traits | PVE          | Reference |
|------------|------------|--------------------------|--------|--------------|-----------|
| Chr 1      | 1.06       | 195218120-195221530      | EL     | 12.7%        | [30]      |
| Chr 2      | 2.01       | 1547887-1552664          | EL     | 31.5%        |           |
| Chr 10     | 10.02      | 5006086-5010500          | EL     | 11.0%        |           |
| Chr 10     | 10.04      | 88410123-93648318        | EL     | 11.29%       | [32]      |
| Chr 3      | 3.06       | 175599768-176836115      | EL     | 13.64%       |           |
| Chr 6      | 6.00       | 3575200-3577200          | EL     | 18.87%       | [34]      |
| Chr 1      | 1.08       | 230072700-230078262      | ED     | 24.0%        |           |
| Chr 2      | 3.06       | 168409685-191113733      | ED     | 21.0%        | [35]      |
| Chr 6      | 6.06       | 153956114-161325348      | ED     | 19.0%        |           |
| Chr 7      | 7.03       | 128175453-156050470      | ED     | 16.0%        |           |
| Chr 8      | 8.06       | 146426603-165267974      | ED     | 13.0%        |           |
| Chr 3      | -          | -                        | ED     | 14.2-18.4%   | [38]      |
| Chr 7      | -          | -                        | ED     | 11.2-16.4%   |           |
| Chr 7      | -          | -                        | ED     | 10.9-13.6    |           |
| Chr 8      | 8.03       | 91588208-99909909        | ED     | 16.0%        | [36]      |
| Chr 8      | 8.03       | 25014690-70809767        | ED     | 11.4%        |           |
| Chr 7      | 7.03       | 153701000-155251000      | ED     | 11.6%        | [39]      |
| Chr 1      | 1.03       | 34257652-36165900        | ED     | 11.71%       |           |
| Chr 3      | 3.05       | 158552133-158938325      | ED     | 14.13-15.68% | [20]      |
| Chr 9      | 9.03-9.04  | 45381581-101748531       | KRN    | 13.2%        |           |
| Chr 2      | 2.02       | 18,629,118- 19,244,753   | KRN    | 10.6%        | [44]      |
| Chr 10     | 10.02      | 120,849,364- 121,772,419 | KRN    | 16.9%        |           |
| Chr 2      | 2.02       | 4895674-15258245         | KRN    | 16.12%       |           |
| Chr 2      | 2.01-2.02  | 3067260-15258245         | KRN    | 17.07%       | [45]      |
| Chr 4      | 4.06-4.08  | 222615724-237427552      | KRN    | 12.06%       |           |
| Chr 8      | 8.02-8.03  | 18612393-33373788        | KRN    | 22.24%       |           |

|        |             |                     |      |               |      |
|--------|-------------|---------------------|------|---------------|------|
| Chr 8  | 8.02        | 16918707-18615853   | KRN  | 36.76%        |      |
| Chr 2  | 2.08-2.09   | 218356370-225232401 | KRN  | 10.75%-14.75% | [49] |
| Chr 1  | 1.01-1.07   | 6404117-208483075   | KNPR | 10.4%-11.8%   | [51] |
| Chr 10 | 10.02-10.03 | 4996876-24622715    | KNPR | 17.01%        | [52] |
| Chr 1  | 1.09        | 259363954-259365311 | KNPR | 14.30%        |      |
| Chr 1  | 1.08        | 241037980-241285679 | KNPR | 17.60%        | [53] |
| Chr 1  | 1.10        | 278617734-278674963 | KNPR | 17.70-%       |      |
| Chr 1  | 1.01-1.02   | 2035-661-23566071   | KNPR | 11.8%         | [54] |
| Chr 7  | 7.05        | 170843056-171585347 | KNPR | 10.3%         |      |
| Chr 8  | 8.05-8.06   | 110450438-136744298 | KNPR | 14.1%         | [56] |
| Chr 1  | 1.02        | 14850152-26697162   | KW   | 16.06%        |      |
| Chr 2  | 2.01-2.02   | 3067260-4706609     | KW   | 10.76%        |      |
| Chr 2  | 2.06-2.07   | 182622042-193713974 | KW   | 10.78%-11.86% |      |
| Chr 1  | 1.02-1.03   | 15805373-33130048   | KT   | 10.79%-12.0%  |      |
| Chr 1  | 1.02-1.03   | 26684809-43762703   | HKW  | 10.03%-12.23% |      |
| Chr 1  | 1.04        | 64243765-82199916   | HKW  | 12.02%-12.20% |      |
| Chr 1  | 1.05-1.06   | 170491369-187434251 | HKW  | 12.80%        | [57] |
| Chr 1  | 1.06-1.07   | 194693263-206509065 | HKW  | 10.21%        |      |
| Chr 3  | 3.04-3.05   | 122531243-137558544 | KW   | 10.80%-13.30% |      |
| Chr 1  | 1.01        | 52250200-66032549   | KT   | 10.84%        |      |
| Chr 3  | 3.06        | 188955718-188966168 | KT   | 17.93%        |      |
| Chr 1  | 1.03-1.04   | 51316436-64403353   | HKW  | 16.04%        |      |
| Chr 1  | 1.03        | 29264281-7854954    | KL   | 10.3%         |      |
| Chr 4  | 4.10-4.11   | 238860480-239988267 | KL   | 11.89%        |      |
| Chr 8  | 8.02-8.03   | 20674613-99909909   | KL   | 12.85%        |      |
| Chr 1  | 1.02-1.03   | 28926395-34901006   | KW   | 12.12%        | [58] |
| Chr 1  | 1.04-1.06   | 55080810-196623386  | KW   | 11.62%        |      |
| Chr 1  | 1.04-1.06   | 70775896-196623386  | KW   | 12.36%        |      |

|       |           |                     |     |                 |      |
|-------|-----------|---------------------|-----|-----------------|------|
| Chr 3 | 3.01-3.02 | 3478844-5988309     | KW  | 10.16%KT-23.49% |      |
| Chr 2 | 2.02-2.03 | 15139189-28680358   | KT  | 10.41%-15.48%   |      |
| Chr 3 | 3.02-3.03 | 5983469-10080041    | KT  | 20.80%          |      |
| Chr 3 | 3.03      | 10076687-10457618   | KT  | 18.66%          |      |
| Chr 4 | 4.00-4.01 | 609416-1080800      | KT  | 10.63%          |      |
| Chr 4 | 4.00      | 240779448-241788226 | KT  | 22.92%          |      |
| Chr 5 | 4.11      | 163980240-175656519 | KT  | 12.33%          |      |
| Chr 7 | 7.04      | 158972709-162851038 | KT  | 13.39%          |      |
| Chr 2 | 2.05      | 84121511-84122601   | HKW | 10.77%          |      |
| Chr 2 | 2.08-2.09 | 218505544-225662933 | HKW | 13.25%          |      |
| Chr 3 | 3.03      | 10076687-10457618   | HKW | 21.54%          |      |
| Chr 4 | 4.06-4.07 | 161530374-172794795 | HKW | 17.28%          |      |
| Chr 4 | 4.07-4.08 | 178275089-184816591 | HKW | 10.09%          |      |
| Chr 8 | 8.02-8.03 | 20674613-99909909   | HKW | 10.73%          |      |
| Chr 3 | 3.06      | 170265321-179169287 | KL  | 11.36%-11.56%   |      |
| Chr 5 | 5.00      | 755345-2319068      | KW  | 10.20%-11.96%   |      |
| Chr 6 | 6.00      | 655718-5447584      | KW  | 14.25%-18.02%   |      |
| Chr 3 | 3.06      | 179848015-185367968 | KT  | 10.03%-13.19%   | [64] |
| Chr 7 | 7.03      | 134114219-152222515 | KT  | 11.93%          |      |
| Chr 7 | 7.00-7.02 | 2630972-21162260    | HKW | 13.56%          |      |
| Chr 2 | 2.01      | 32000000-33000000   | EL  | 25.6%           | [40] |
| Chr 7 | 7.02      | 85030593-85036292   | KRN | 11.24%          | [46] |

Supplementary Table S6. Summary of QTL clusters for ear-related traits.

| Chromosome | Bin region  | Traits involved | Reference |
|------------|-------------|-----------------|-----------|
| Chr 3      | 3.06        | ED、KL           | [29]      |
| Chr 8      | 8.08        | ED、KL           |           |
| Chr 6      | 6.05        | ED、KRN          |           |
| Chr 10     | 10.06       | EL、ED、KL、KRN    |           |
| Chr 3      | 3.05        | EL、ED           | [30]      |
| Chr 2      | 2.09        | ED、KL           |           |
| Chr 3      | 3.05        | ED、KRNP         |           |
| Chr 9      | 9.03        | ED、KRN、KL       |           |
| Chr 6      | 6.05        | KL、HKW          | [68]      |
| Chr 9      | 9.04        | EL、ED           |           |
| Chr 4      | 4.05-4.06   | EL、ED           | [36]      |
| Chr 8      | 8.03        | ED、HKW          |           |
| Chr 8      | 8.03        | ED、KRN、HKW      |           |
| Chr 7      | 7.04-7.05   | EL、KNPR         |           |
| Chr 7      | 7.02-7.03   | KNR、HKW         |           |
| Chr 10     | 10.02-10.3  | ED、KRN          |           |
| Chr 10     | 10.03-10.07 | ED、KRN          |           |
| Chr 2      | 2.07-2.08   | ED、KRN、KNPR     |           |
| Chr 4      | 4.08        | EL、ERN、HKW      | [31]      |
| Chr 4      | 4.09        | ERN、KNPR、HKW    | [54]      |
| Chr 1      | 1.02-1.03   | KW、KT、HKW       |           |
| Chr 2      | 2.02-2.03   | KRN、KL、KT、HKW   |           |

|        |             |                       |      |
|--------|-------------|-----------------------|------|
| Chr 4  | 4.05        | KL, KW, KT            |      |
| Chr 7  | 7.03        | KL, KW, HKW           |      |
| Chr 8  | 8.06-8.09   | KL, KW, HKW           |      |
| Chr 9  | 9.03-9.04   | KNPR, KL, HKW         |      |
| Chr 10 | 10.03-10.04 | KNPR, KL, KT          |      |
| Chr 2  | 2.08        | ED, KRN               |      |
| Chr 1  | 1.01        | ED, KRN               | [80] |
| Chr 4  | 4.08        | KNR, HKW              |      |
| Chr 8  | 8.02        | ED, KRN, KL           | [45] |
| Chr 3  | 3.07        | EL, KRN               |      |
| Chr 8  | 8.03        | ED, KRN               | [44] |
| Chr 10 | 10.03       | ED, KRN               |      |
| Chr 2  | 2.05        | EL, HKW               |      |
| Chr 10 | 10.03-10.05 | ED, KRN, KW           |      |
| Chr 10 | 10.02-10.03 | EL, ED, KRN, KNPR, KW | [52] |
| Chr 9  | 9.05-9.07   | KNPR, KW              |      |
| Chr 1  | 1.08-1.10   | EL, KNPR              |      |
| Chr 4  | 4.06-4.09   | ED, KRN               |      |
| Chr 5  | 5.06-5.07   | KRN, HKW              | [53] |
| Chr 1  | 1.08-1.10   | EL, KNPR              |      |
| Chr 4  | 4.07-4.08   | ED, KRN               |      |
| Chr 2  | bin 2.02    | EL, ED, KRN           |      |
| Chr 3  | bin 3.08    | EL, ED, KRN, KNPR     | [32] |
| Chr 6  | 6.01        | KRN, HKW              |      |
| Chr 1  | 1.01        | KNPR, HKW             |      |
| Chr 5  | 5.03        | KNPR, HKW             | [70] |
| Chr 7  | 7.04        | KNPR, HKW             |      |
| Chr 2  | 2.00-2.02   | KT, HKW               |      |
| Chr 10 | 10.04       | KT, HKW               | [57] |

|       |           |              |      |
|-------|-----------|--------------|------|
| Chr 1 | 1.02-1.03 | KW、KT、HKW    |      |
| Chr 1 | 1.04-1.06 | KT、HKW       |      |
| Chr 2 | 2.01-2.02 | KW、HKW       |      |
| Chr 2 | 2.05-2.07 | KL、KW、HKW    |      |
| Chr 2 | 2.08      | KW、HKW       |      |
| Chr 4 | 4.07-4.08 | KW、KT、HKW    |      |
| Chr 5 | 5.03      | KW、KT、HKW    |      |
| Chr 9 | 9.03-9.04 | KL、KT        |      |
| Chr 1 | 1.02-1.03 | KW、HKW       |      |
| Chr 1 | 1.08-1.10 | KL、KT        |      |
| Chr 3 | 3.05-3.06 | KL、KT、HKW    |      |
| Chr 7 | 7.02      | KT、HKW       | [58] |
| Chr 7 | 7.03-7.04 | KL、KT、HKW    |      |
| Chr 8 | 8.05-8.07 | KL、KW、KT、HKW |      |
| Chr 9 | 9.07      | KL、KW、HKW    |      |
| Chr 1 | 1.02      | KL、KW        |      |
| Chr 1 | 1.07      | KL、KW        |      |
| Chr 2 | 2.05      | KL、KW、HKW    |      |
| Chr 5 | 5.00-5.03 | KW、HKW       |      |
| Chr 5 | 5.04      | KL、KW        | [53] |
| Chr 7 | 7.04-7.05 | KW、HKW       |      |
| Chr 7 | 7.01      | KT、HKW       |      |
| Chr 8 | 8.06      | KT、HKW       |      |

**Supplementary Table S7.** The distribution of stable QTLs, major QTLs and QTL clusters in 23 bin hotspots.

| Bin region         | Stable QTL/<br>Individual | Major QTL/<br>Individual | QTL CLusters/<br>ndividual |
|--------------------|---------------------------|--------------------------|----------------------------|
| bin 1.01- bin 1.02 | 3                         | 7                        | 6                          |
| bin 1.03           | 3                         | 6                        | 3                          |
| bin 1.04           | 4                         | 4                        | 1                          |
| bin 1.06           | 1                         | 5                        | 1                          |
| bin 1.07           | 0                         | 2                        | 1                          |
| bin 2.02           | 2                         | 5                        | 4                          |
| bin 2.05           | 2                         | 1                        | 3                          |
| bin 2.08           | 3                         | 2                        | 3                          |
| bin 3.05           | 3                         | 2                        | 3                          |
| bin 3.06           | 3                         | 5                        | 2                          |
| bin 4.06           | 2                         | 2                        | 3                          |
| bin 4.08           | 5                         | 2                        | 4                          |
| bin 5.03           | 2                         | 0                        | 3                          |
| bin 5.04           | 2                         | 0                        | 1                          |
| bin 6.05           | 1                         | 0                        | 2                          |
| bin 7.03           | 2                         | 3                        | 3                          |
| bin 8.02           | 0                         | 4                        | 1                          |
| bin 8.03           | 0                         | 5                        | 4                          |
| bin 8.05           | 0                         | 1                        | 1                          |
| bin 9.03           | 5                         | 1                        | 3                          |
| bin 9.04           | 6                         | 1                        | 3                          |
| bin 10.02          | 1                         | 3                        | 2                          |
| bin 10.03          | 3                         | 1                        | 5                          |
| Total              | 53                        | 62                       | 62                         |



**Supplementary Table S8.** Distribution table of ear-related traits in hotspot bin regions.

|                     | EL | ED | KRN | KNPR | KL | KW | KT | HKW | Total |
|---------------------|----|----|-----|------|----|----|----|-----|-------|
| bin 1.01- bin 1.02* | 1  | 0  | 2   | 2    | 2  | 3  | 2  | 3   | 15    |
| bin 1.03*           | 0  | 1  | 1   | 0    | 0  | 2  | 4  | 1   | 9     |
| bin 1.04*           | 0  | 0  | 1   | 0    | 0  | 3  | 3  | 2   | 9     |
| bin 1.06*           | 2  | 0  | 0   | 0    | 2  | 2  | 1  | 3   | 10    |
| bin 1.07            | 1  | 0  | 1   | 2    | 2  | 0  | 0  | 1   | 7     |
| bin 2.02            | 3  | 0  | 4   | 0    | 0  | 0  | 2  | 1   | 10    |
| bin 2.05            | 1  | 0  | 0   | 1    | 2  | 1  | 0  | 2   | 7     |
| bin 2.08            | 1  | 0  | 1   | 0    | 0  | 4  | 0  | 4   | 10    |
| bin 3.05*           | 1  | 0  | 2   | 0    | 3  | 3  | 0  | 0   | 9     |
| bin 3.06            | 1  | 1  | 0   | 0    | 5  | 2  | 1  | 0   | 10    |
| bin 4.06*           | 0  | 2  | 3   | 0    | 0  | 2  | 1  | 2   | 10    |
| bin 4.08*           | 3  | 1  | 3   | 1    | 1  | 2  | 2  | 2   | 15    |
| bin 5.03*           | 0  | 1  | 2   | 2    | 0  | 1  | 2  | 1   | 9     |
| bin 5.04*           | 2  | 1  | 5   | 2    | 1  | 2  | 2  | 0   | 15    |
| bin 6.05*           | 1  | 0  | 2   | 1    | 1  | 0  | 0  | 0   | 5     |
| bin 7.03*           | 1  | 1  | 1   | 2    | 2  | 1  | 3  | 1   | 12    |
| bin 8.02*           | 1  | 0  | 3   | 0    | 1  | 0  | 1  | 1   | 7     |
| bin 8.03*           | 0  | 2  | 3   | 2    | 1  | 0  | 0  | 1   | 9     |
| bin 8.05            | 2  | 1  | 2   | 0    | 0  | 0  | 1  | 0   | 6     |
| bin 9.03            | 1  | 2  | 3   | 0    | 1  | 0  | 1  | 1   | 9     |
| bin 9.04*           | 1  | 0  | 2   | 1    | 5  | 0  | 1  | 1   | 11    |
| bin 10.02           | 1  | 1  | 1   | 1    | 1  | 0  | 1  | 1   | 7     |
| bin 10.03*          | 0  | 2  | 1   | 1    | 1  | 0  | 1  | 0   | 6     |

Note: Candidate genes for ear-related traits are present in the bin region marked with\*.
